# Supplementary material for: Sexual dimorphism in striatal dopaminergic responses promotes monogamy in social songbirds
Source: eLife journal article supplement (doi:10.7554/elife.25819), 2017-08-11

breeding pair

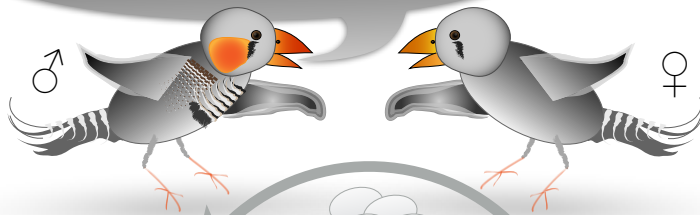

separation  
7 days  
after  
hatching of  
offspring

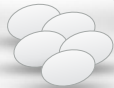

offspring  
~30 days

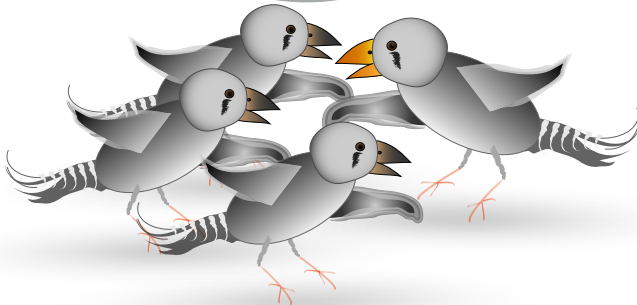

**injection** of D2 receptor tracer  
[<sup>111</sup>C]raclopride

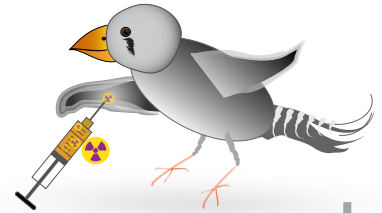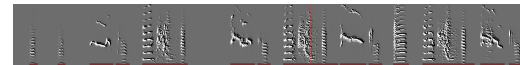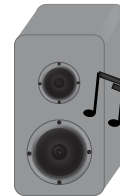

20 min **auditory  
stimulation**  
with mate's  
or non-mate  
song

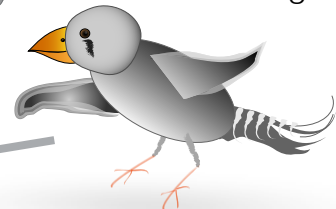

**PET** 60 min  
+  
**CT** 10 min

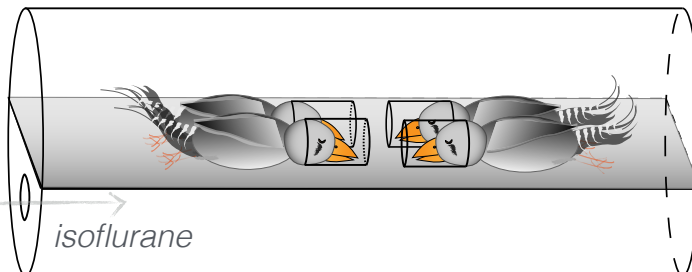

Supplement: supp [file elife_poa_e25819_Figure_7_Figure_Supplement_1.pdf › elife_poa_e25819_Figure_7_Figure_Supplement_1.pdf]
