# Supplementary figures and images for: Sexual dimorphism in striatal dopaminergic responses promotes monogamy in social songbirds
Source: eLife journal article supplement (doi:10.7554/elife.25819), 2017-08-11

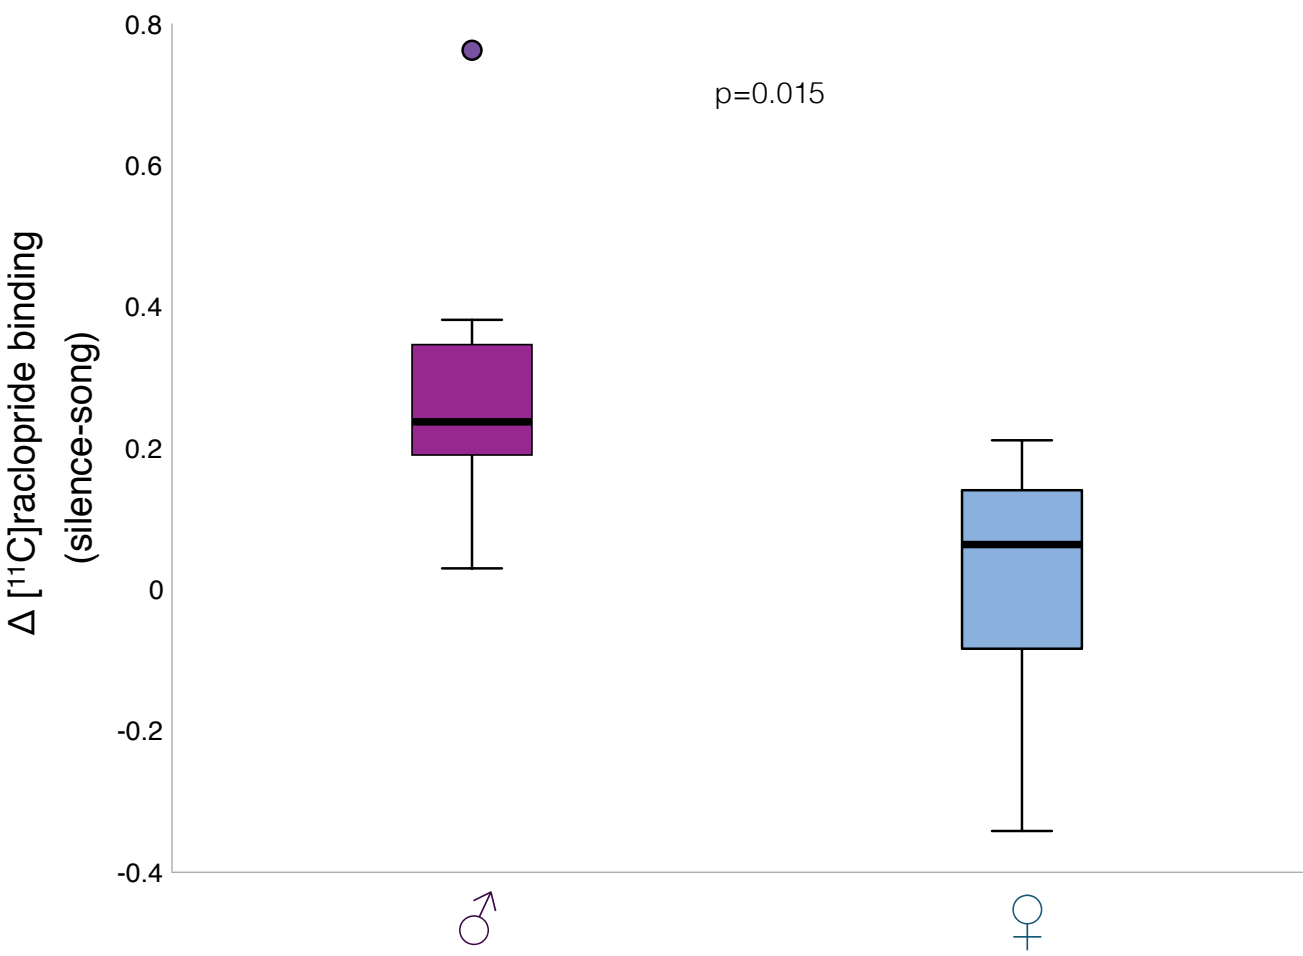

Supplement: supp [file elife_poa_e25819_Figure_3_Figure_Supplement_1.pdf › elife_poa_e25819_Figure_3_Figure_Supplement_1.pdf]

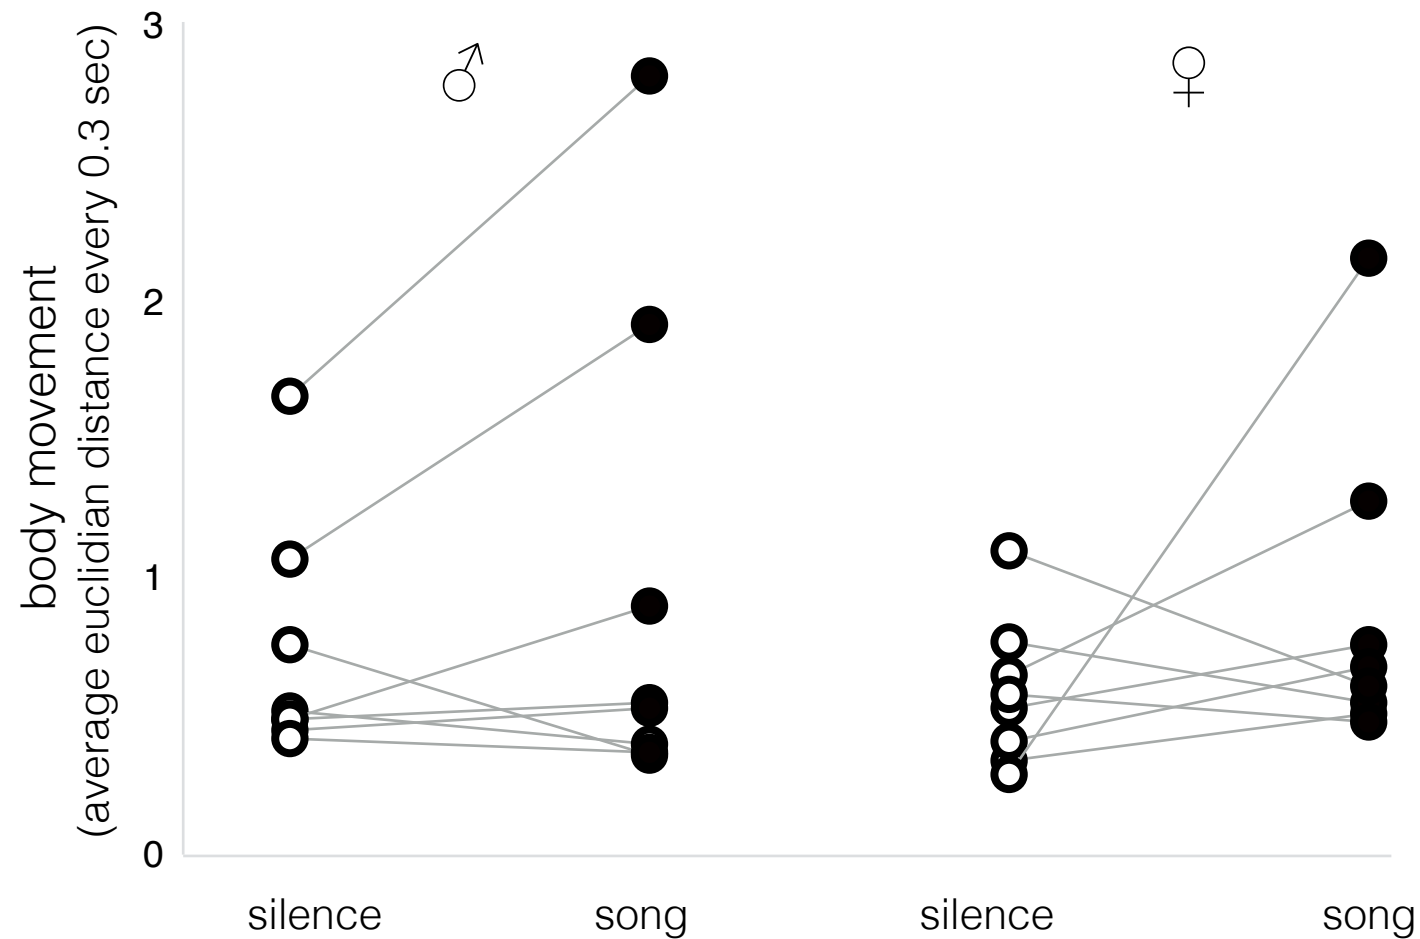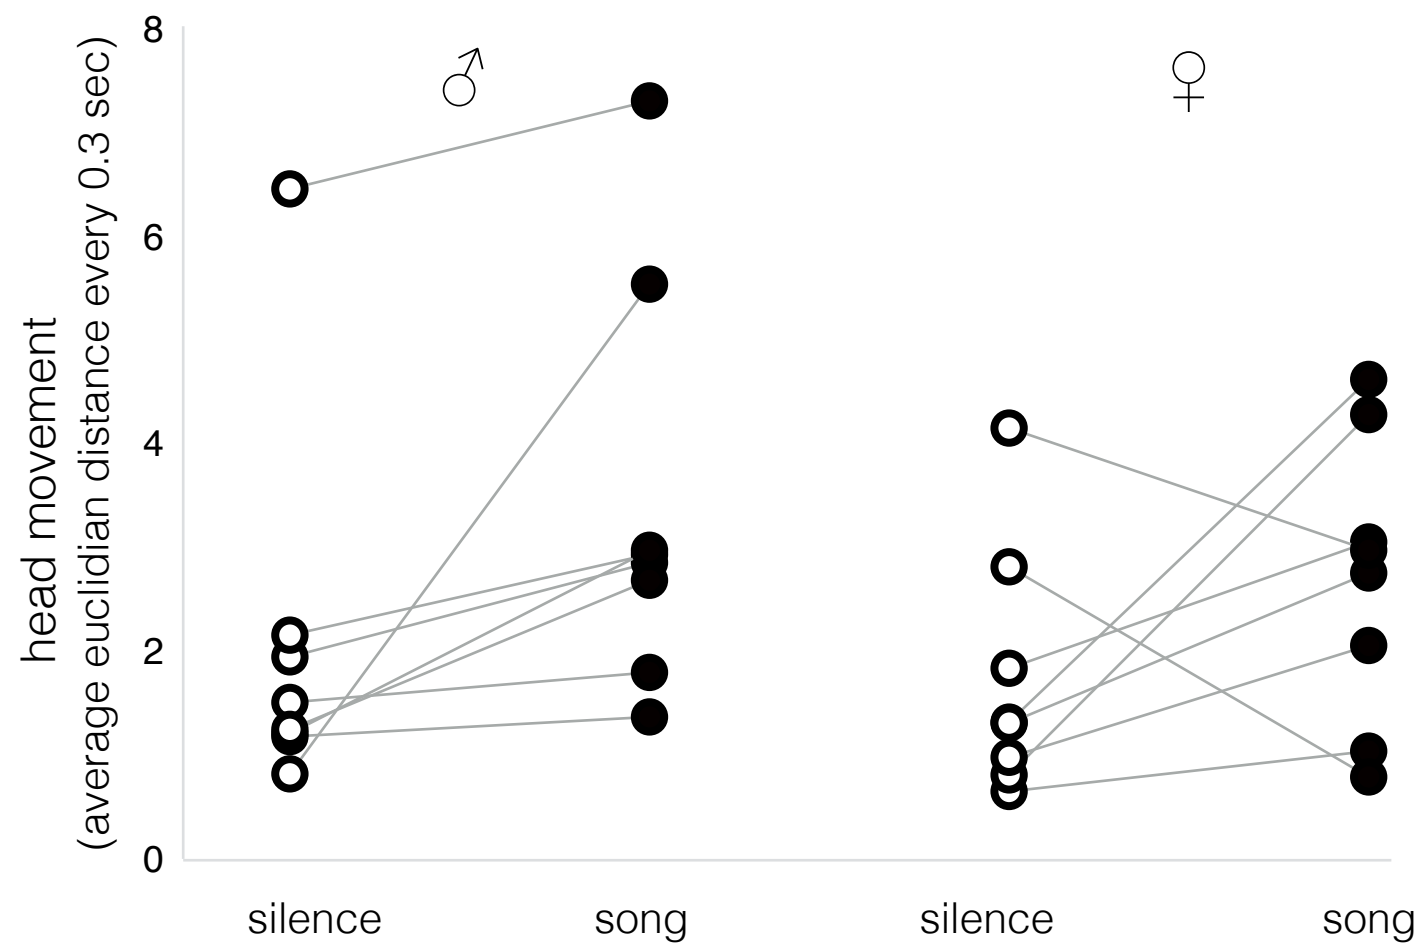

Supplement: supp [file elife_poa_e25819_Figure_3_Figure_Supplement_2.pdf › elife_poa_e25819_Figure_3_Figure_Supplement_2.pdf]

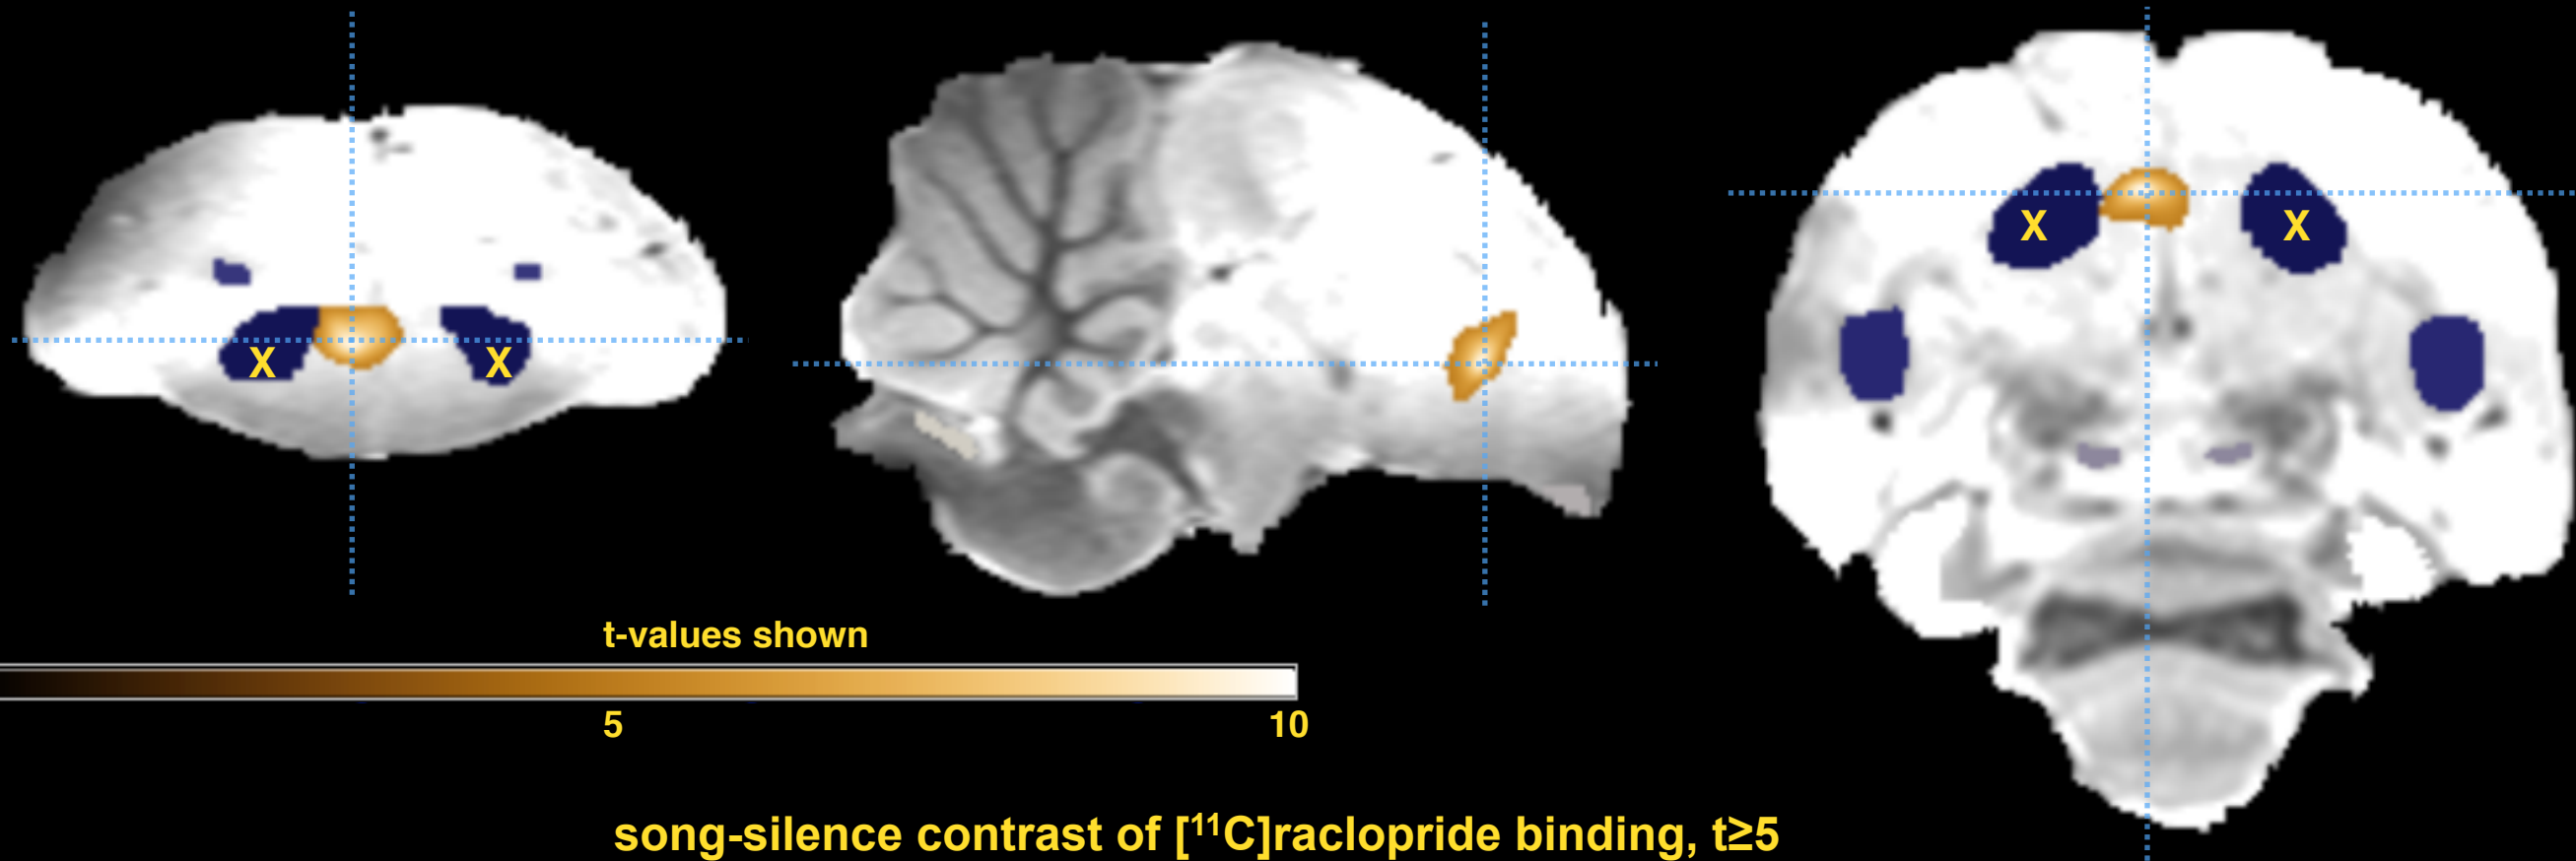

Supplement: supp [file elife_poa_e25819_Figure_3_Figure_Supplement_3.pdf › elife_poa_e25819_Figure_3_Figure_Supplement_3.pdf]

[<sup>11</sup>C]raclopride binding  
(striatal-cerebellar ratio)

L-741,626

saline

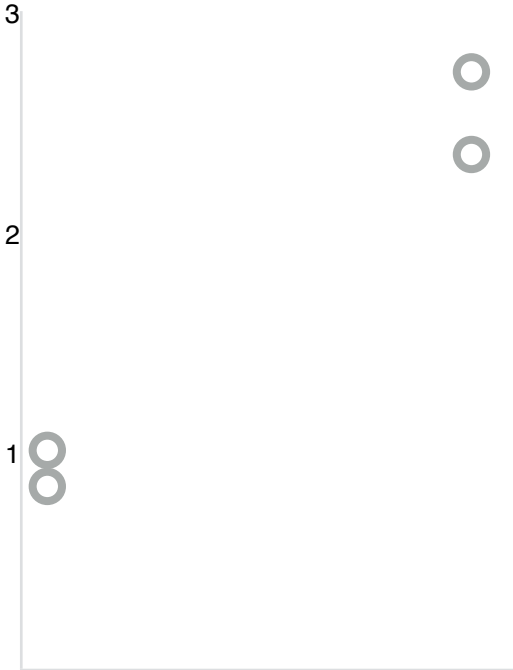

Supplement: supp [file elife_poa_e25819_Figure_5_Figure_Supplement_1.pdf › elife_poa_e25819_Figure_5_Figure_Supplement_1.pdf]
